# Supplementary material for: Analysis of subsequent therapy in Japanese patients with hormone receptor‒positive/human epidermal growth factor receptor 2‒negative advanced breast cancer who received palbociclib plus endocrine therapy in PALOMA-2 and -3
Source: PubMed Central journal article supplement (PMC7925474; doi:10.1007/s12282-020-01162-4), 2020-10-21
Supplement: 12282_2020_1162_MOESM1_ESM.pdf [file 12282_2020_1162_MOESM1_ESM.pdf]

## **Electronic Supplementary Material**

Title: Analysis of Subsequent Therapy in Japanese Patients With Hormone-Receptor–  
Positive/Human Epidermal Growth Factor Receptor 2–Negative Advanced Breast Cancer Who  
Received Palbociclib Plus Endocrine Therapy in PALOMA-2 and -3

Journal: *Breast Cancer*

Authors: Norikazu Masuda, Hirofumi Mukai, Kenichi Inoue, Yoshiaki Rai, Shinji Ohno,  
Shoichiro Ohtani, Chikako Shimizu, Satoshi Hashigaki, Yasuaki Muramatsu, Yoshiko  
Umeyama, Hiroji Iwata, Masakazu Toi

### **Corresponding Author**

Norikazu Masuda

National Hospital Organization Osaka National Hospital

2-1-14, Hoenzaka, Chuou-ku

Osaka-City 540-0006, Japan

Telephone: +81-6-6942-1331

Fax: +81-6-6946-3608

Email: [nmasuda@alpha.ocn.ne.jp](mailto:nmasuda@alpha.ocn.ne.jp)

**Supplemental Table 1. Overall Population: Types of First Subsequent Therapy [9,10]**

|                                            | <b>PALOMA-2</b>                        |                            | <b>PALOMA-3</b>                          |                            |
|--------------------------------------------|----------------------------------------|----------------------------|------------------------------------------|----------------------------|
|                                            | <b>(Data Cutoff:<br/>May 31, 2017)</b> |                            | <b>(Data Cutoff:<br/>April 13, 2018)</b> |                            |
| <b>Systemic Anticancer Therapy, n (%)</b>  | <b>PAL+LET<br/>(n=444)</b>             | <b>PBO+LET<br/>(n=222)</b> | <b>PAL+FUL<br/>(n=347)</b>               | <b>PBO+FUL<br/>(n=174)</b> |
| Received any first subsequent therapy      | 227 (51)                               | 150 (68)                   | 248 (71)                                 | 140 (80)                   |
| Endocrine therapy                          | 138 (61)                               | 87 (58)                    | 100 (40)                                 | 52 (37)                    |
| Selective estrogen receptor degraders; FUL | 70 (31)                                | 44 (29)                    | NR                                       | NR                         |
| Steroidal aromatase inhibitors; exemestane | 49 (22)                                | 35 (23)                    | 57 (23)                                  | 25 (18)                    |
| Selective estrogen receptor modulators     | 16 (7)                                 | 5 (3)                      | NR                                       | NR                         |
| Nonsteroidal aromatase inhibitors          | 3 (1)                                  | 3 (2)                      | NR                                       | NR                         |
| Chemotherapy                               | 83 (37)                                | 51 (34)                    | 138 (56)                                 | 87 (62)                    |
| Capecitabine                               | 28 (12)                                | 19 (13)                    | 66 (27)                                  | 36 (26)                    |
| Paclitaxel                                 | 29 (13)                                | 19 (13)                    | 31 (12)                                  | 31 (22)                    |
| Cyclophosphamide                           | NR                                     | NR                         | 13 (5)                                   | 8 (6)                      |
| Anthracyclines                             | 14 (6)                                 | 7 (5)                      | NR                                       | NR                         |
| Doxorubicin                                | NR                                     | NR                         | 12 (5)                                   | 1 (1)                      |
| mTOR inhibitor; everolimus                 | 31 (14)                                | 26 (17)                    | 40 (16)                                  | 21 (15)                    |
| CDK4/6 inhibitor                           | 0                                      | 13 (9)                     | 6 (2)                                    | 9 (6)                      |
| Palbociclib                                | 0                                      | 13 (9)                     | 4 (2)                                    | 7 (5)                      |
| Ribociclib                                 | NR                                     | NR                         | 1 (<1)                                   | 2 (1)                      |
| Abemaciclib                                | NR                                     | NR                         | 1 (<1)                                   | 0                          |
| Investigational drug                       | 23 (10)                                | 17 (11)                    | NR                                       | NR                         |

CDK4/6=cyclin-dependent kinase 4/6; FUL=fulvestrant; LET=letrozole; mTOR=mammalian target of rapamycin; NR=not reported; PAL=palbociclib; PBO=placebo.

**Supplemental Table 2. Japanese Patients in PALOMA-3: Type of First Subsequent Therapy by Number of Prior Lines of Therapy for Advanced/Metastatic Disease**

|                                                                    | PAL+FUL       |                |              | PBO+FUL       |                |              |
|--------------------------------------------------------------------|---------------|----------------|--------------|---------------|----------------|--------------|
|                                                                    | (n=27)        |                |              | (n=8)         |                |              |
| <b>Prior lines of therapy in the context of metastatic disease</b> | <b>0 or 1</b> | <b>2 or ≥3</b> | <b>Total</b> | <b>0 or 1</b> | <b>2 or ≥3</b> | <b>Total</b> |
|                                                                    | (n=21)        | (n=6)          | (n=27)       | (n=6)         | (n=2)          | (n=8)        |
| No subsequent therapy received, n (%)                              | 4 (19)        | 1 (17)         | 5 (19)       | 1 (17)        | 0              | 1 (13)       |
| Study treatment ongoing                                            | 3 (75)        | 1 (100)        | 4 (80)       | 0             | 0              | 0            |
| Study treatment terminated                                         | 1 (25)        | 0              | 1 (20)       | 1 (100)       | 0              | 1 (100)      |
| Received any first subsequent therapy, n (%)                       | 17 (81)       | 5 (83)         | 22 (81)      | 5 (83)        | 2 (100)        | 7 (88)       |
| Endocrine-based therapy                                            | 10 (59)       | 2 (40)         | 12 (55)      | 2 (40)        | 1 (50)         | 3 (43)       |
| Chemotherapy                                                       | 5 (29)        | 2 (40)         | 7 (32)       | 3 (60)        | 1 (50)         | 4 (57)       |
| Other (investigational drug)                                       | 2 (12)        | 1 (20)         | 3 (14)       | 0             | 0              | 0            |

FUL=fulvestrant; PAL=palbociclib; PBO=placebo.
